# Supplementary material for: One-step co-electrodeposition of SnBi for efficient electrochemical reduction of carbon dioxide to formic acid
Source: Royal Society of Chemistry journal article supplement (doi:10.1039/d2cy00859a), 2022-11-25
Supplement: d2cy00859a1.pdf [file d2cy00859a1.pdf]

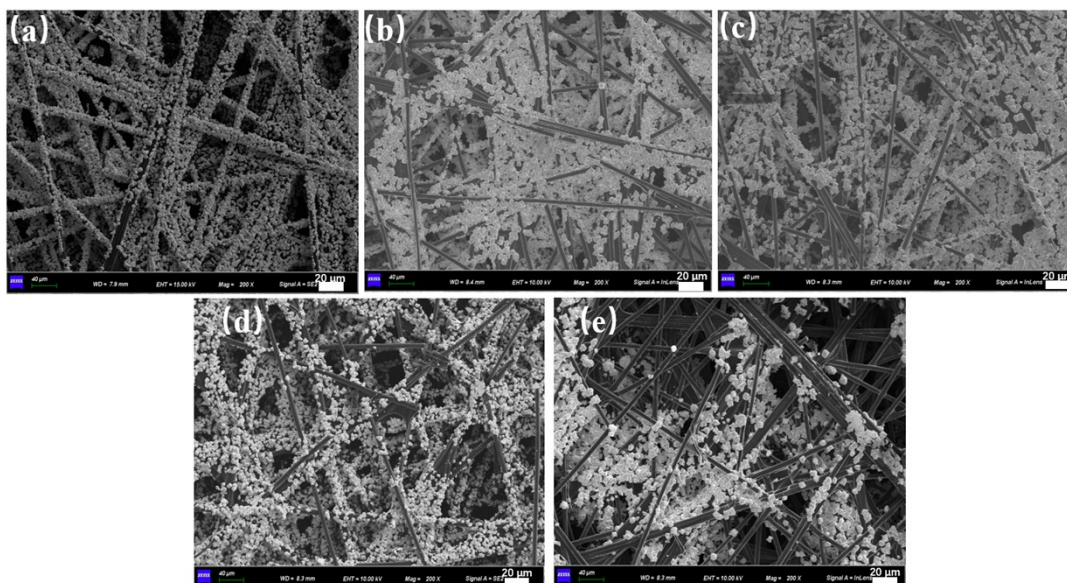

**Fig. S1** SEM images of  $\text{Sn}_{0.5}\text{Bi}$  catalyst electrodeposited at different temperatures (a) 25°C (b) 30°C (c) 35°C (d) 40°C (e) 45°C

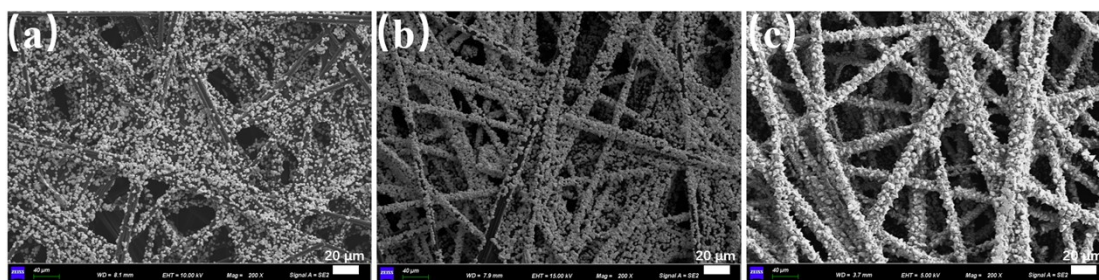

**Fig. S2** Magnified SEM images of  $\text{Sn}_{0.5}\text{Bi}$  catalyst under different deposition current densities (a)  $1 \text{ mA} \cdot \text{cm}^{-2}$  (b)  $2 \text{ mA} \cdot \text{cm}^{-2}$  (c)  $3 \text{ mA} \cdot \text{cm}^{-2}$

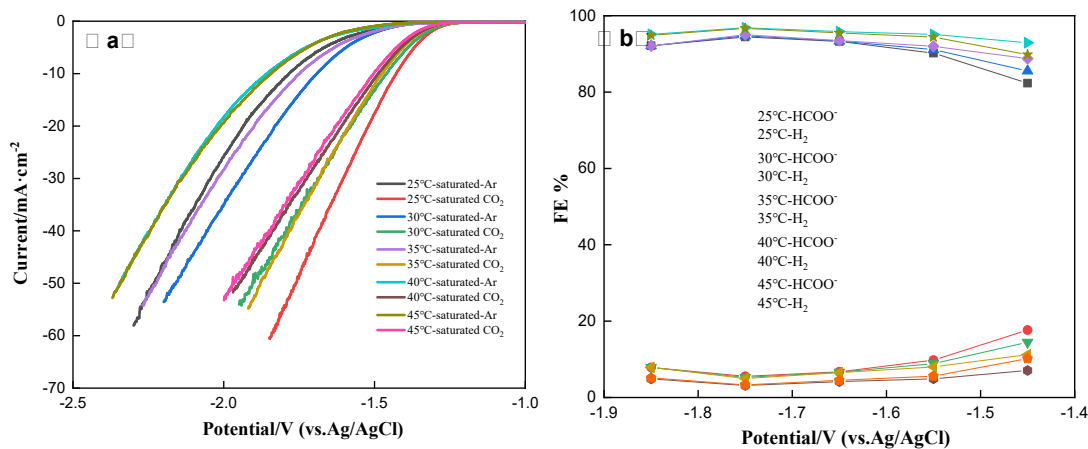

**Fig. S3** Performance test diagram of  $\text{Sn}_{0.5}\text{Bi}$  catalyst electrodeposited at different temperature (a) LSV (b) FE-

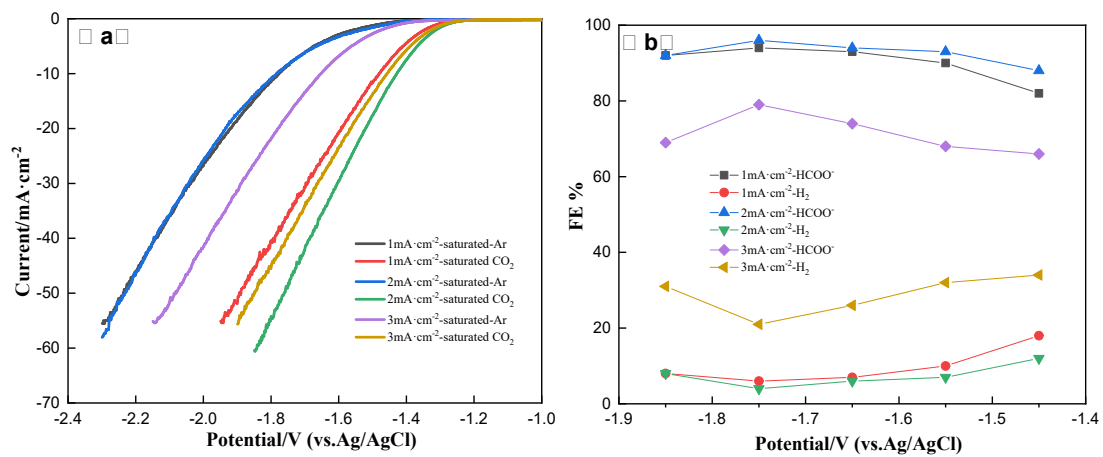

**Fig. S4** Performance test diagram of Sn<sub>0.5</sub>Bi catalyst under different deposition current densities (a) LSV (b)

FE-E

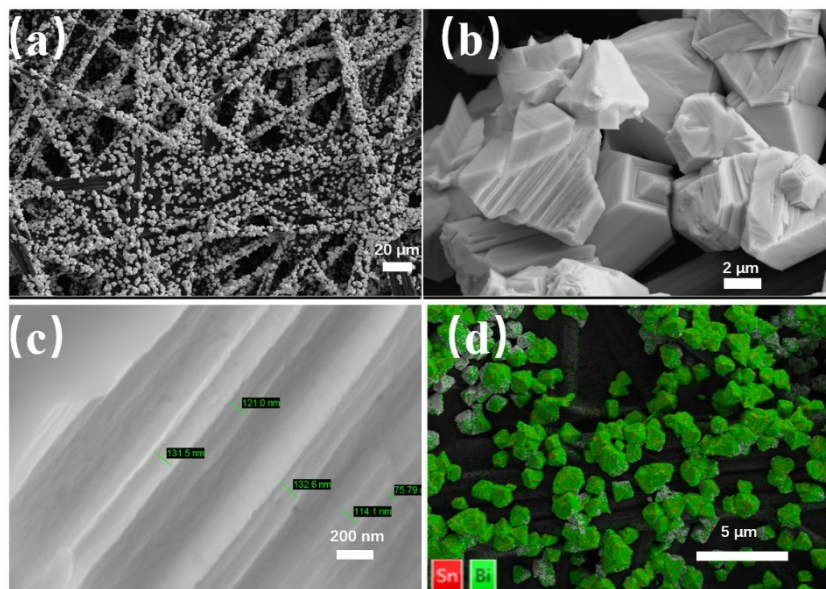

**Fig. S5** The SEM image of Sn<sub>0.25</sub>Bi catalyst (a) 20 μm (b) 2 μm (c) 200 nm (d) Mapping map (Bi is green, Sn is red)

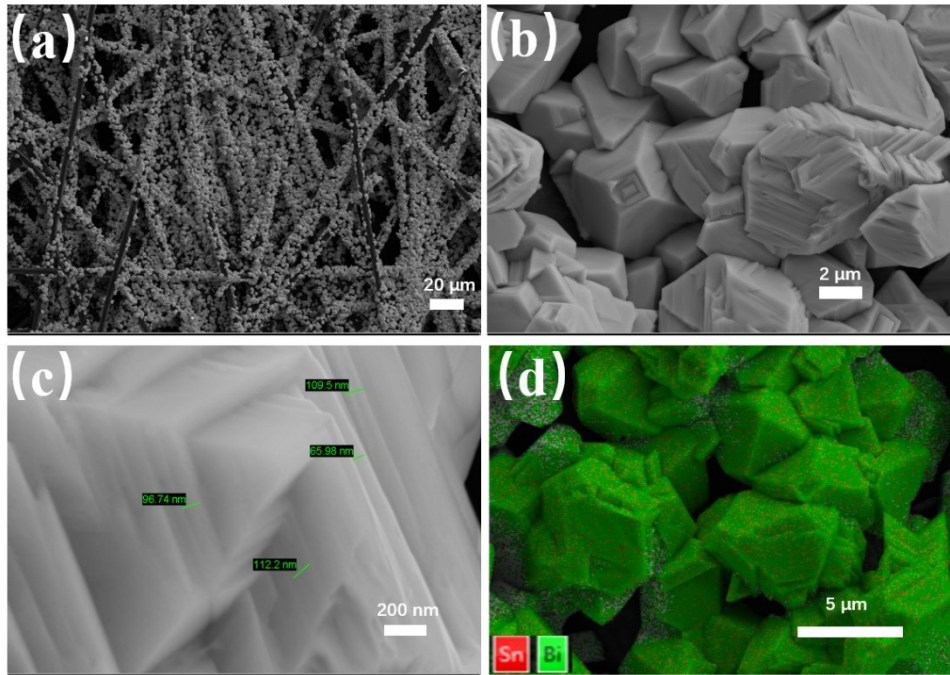

**Fig. S6** The SEM image of Sn<sub>0.75</sub>Bi catalyst (a) 20 μm (b) 2 μm (c) 200 nm (d) Mapping map (Bi is green, Sn is red)

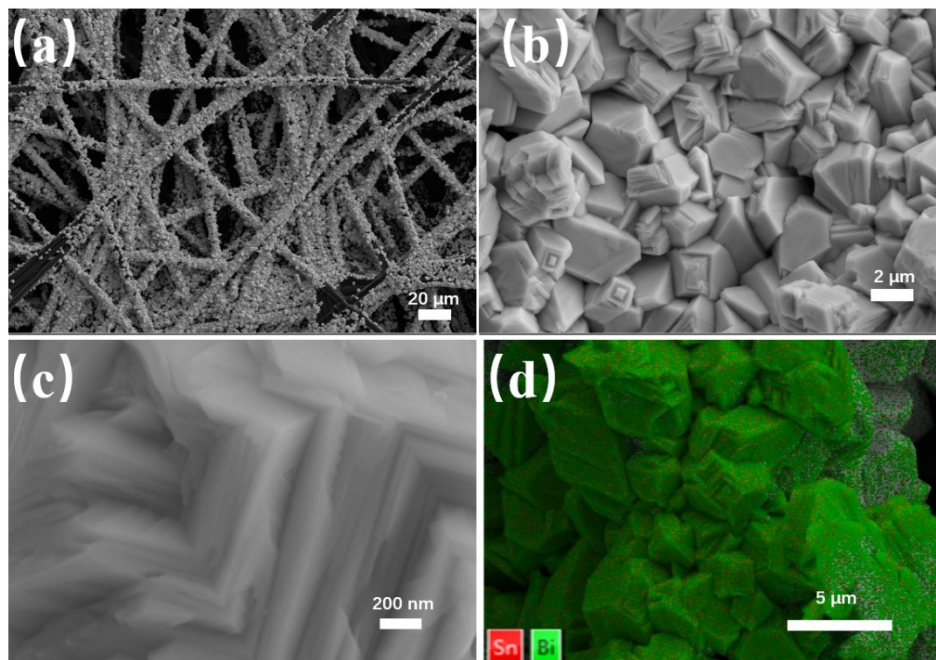

**Fig. S7** The SEM image of Sn<sub>1</sub>Bi catalyst (a) 20 μm (b) 2 μm (c) 200 nm (d) Mapping map (Bi is green, Sn is red)

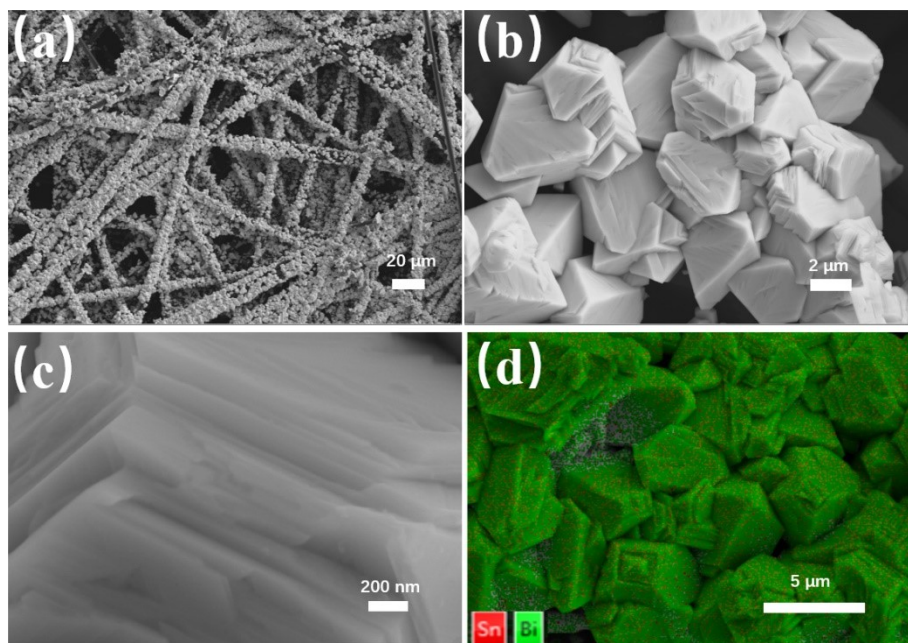

**Fig. S8** The SEM image of  $\text{Sn}_{1.25}\text{Bi}$  catalyst (a) 20  $\mu\text{m}$  (b) 2  $\mu\text{m}$  (c) 200 nm (d) Mapping map (Bi is green, Sn is red)

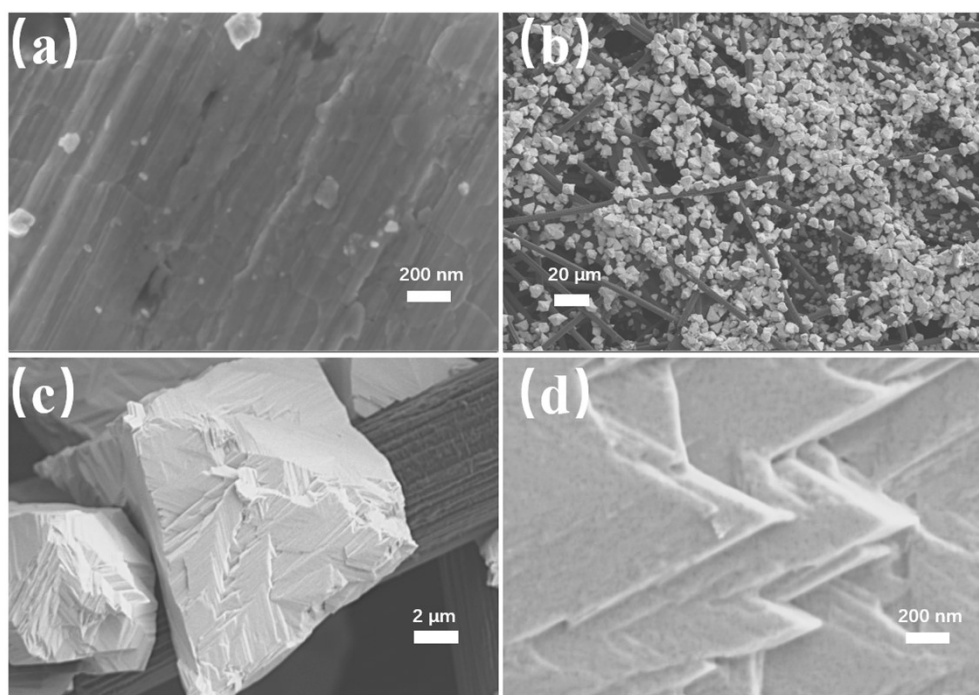

**Fig. S9** The SEM images of pure Bi materials (a) Commercial pure Bi 200 nm ; Electrodeposited pure Bi (b) 20  $\mu\text{m}$  (c) 2  $\mu\text{m}$  (d) 200 nm

**Table S1** Proportion of micro surface elements of each SnBi catalyst

| Sn <sup>2+</sup> /Bi <sup>3+</sup> molar ratio | Bi (%) | Sn (%) |
|------------------------------------------------|--------|--------|
| 0.25                                           | 97.33  | 2.68   |
| 0.5                                            | 97.66  | 2.33   |
| 0.75                                           | 95.25  | 4.75   |
| 1                                              | 94.29  | 5.71   |
| 1.25                                           | 93.89  | 6.1    |

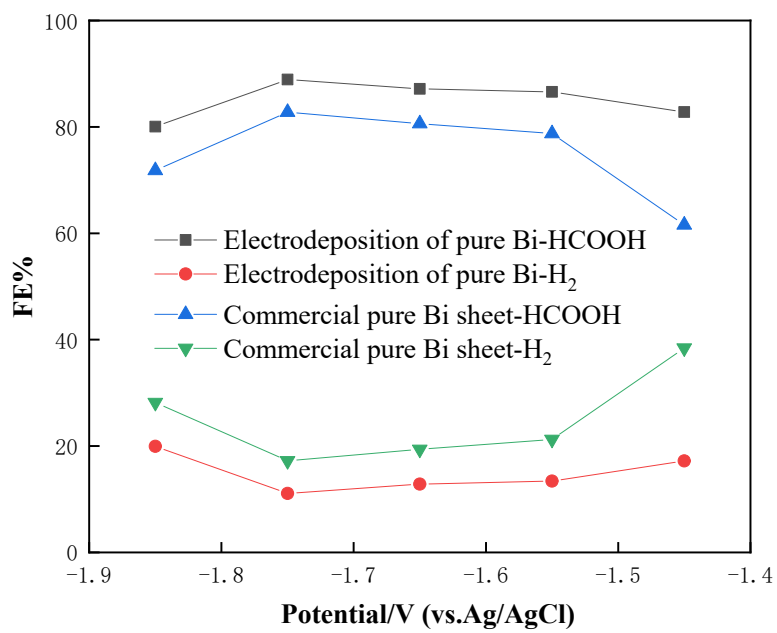

**Fig. S10** Performance test chart of SnBi catalyst materials (a) Cdl (b) LSV (c) FE-E ; Performance test diagram of pure Bi (d) FE-E

**Table S2** Proportion of micro surface elements of each SnBi catalyst

| Sn <sup>2+</sup> /Bi <sup>3+</sup> molar ratio is 0.5 | Bi (%) | Sn (%) |
|-------------------------------------------------------|--------|--------|
| before reaction                                       | 97.66  | 2.33   |
| after the reaction                                    | 98.02  | 1.98   |
